# Supplementary material
Source: PubMed Central journal article supplement (PMC4210120)
Supplement: ja506798e_si_001.pdf [file ja506798e_si_001.pdf]

*(Supporting Information)*

# Synthetic Polymers Active Against *Clostridium difficile* Vegetative Cell Growth and Spore Outgrowth

Runhui Liu<sup>1,†</sup>, Jose M. Suárez<sup>3,†</sup>, Bernard Weisblum<sup>2</sup>, Samuel H. Gellman<sup>1,\*</sup> and Shonna M. McBride<sup>3,\*</sup>

<sup>1</sup>Department of Chemistry, and <sup>2</sup>Department of Medicine, University of Wisconsin, Madison, WI, USA 53706.

<sup>3</sup>Department of Microbiology and Immunology, Emory University School of Medicine, Atlanta, GA, USA 30322

<sup>†</sup>Contributed equally to this work

<sup>†</sup>Co-corresponding authors:

<sup>†</sup> S.H.G. address: University of Wisconsin-Madison Dept. of Chemistry, 1101 University Avenue, Madison, WI 53706. E-mail: [gellman@chem.wisc.edu](mailto:gellman@chem.wisc.edu). Tel: (608) 262-3303. Fax: (608) 265-4534.

<sup>†</sup> S.M.M. address: Department of Microbiology and Immunology, Emory University School of Medicine, 1510 Clifton Rd, Atlanta, GA 30322. E-mail: [shonna.mcbride@emory.edu](mailto:shonna.mcbride@emory.edu). Tel: (404) 727-6192. Fax: (404) 727-8250.

## Materials and Methods

$^1\text{H}$  spectra were collected on a Bruker Avance III 400 spectrometer at 400 MHz using  $\text{D}_2\text{O}$  as the solvent.  $^1\text{H}$  NMR chemical shifts were referenced to the resonance for residual protonated solvent ( $\delta$  4.79 for  $\text{D}_2\text{O}$ ). MM-TM polymers were characterized by GPC in at the side-chain NHBoc protected stage using  $\text{dn/dc}$  of 0.1 ml/g for all polymers as described previously.<sup>1,2</sup> The GPC (Shimadzu) was equipped with two Waters columns (Styragel HR 4E, particle size 5  $\mu\text{m}$ ) linked in series, a multi-angle light scattering detector (Wyatt miniDAWN, 690 nm, 30 mW), and a refractive index detector (Wyatt Optilab-rEX, 690 nm). THF was used as the mobile phase at a flow rate of 1 mL/min at 40  $^\circ\text{C}$ . The fully deprotected MM-TM polymers were characterized by  $^1\text{H}$  NMR (see spectra below). All other polymers were reported and characterized previously.<sup>2-4</sup> All copolymers in this study were prepared in via anionic ring-opening copolymerization of a mixture of two  $\beta$ -lactam monomers. Polymers are named on the  $\beta$ -lactam proportion used for the polymerization reaction. Thus, "50:50 DM:TM" is the copolymer produced from copolymerization of  $\beta$ -lactams DM $\beta$  and TM $\beta$  in 50:50 (mol:mol) ratio. The actual ratio of two subunits within each polymer can vary from the  $\beta$ -lactam proportion, especially for some of the MM:TM copolymers described below (see Table S1).

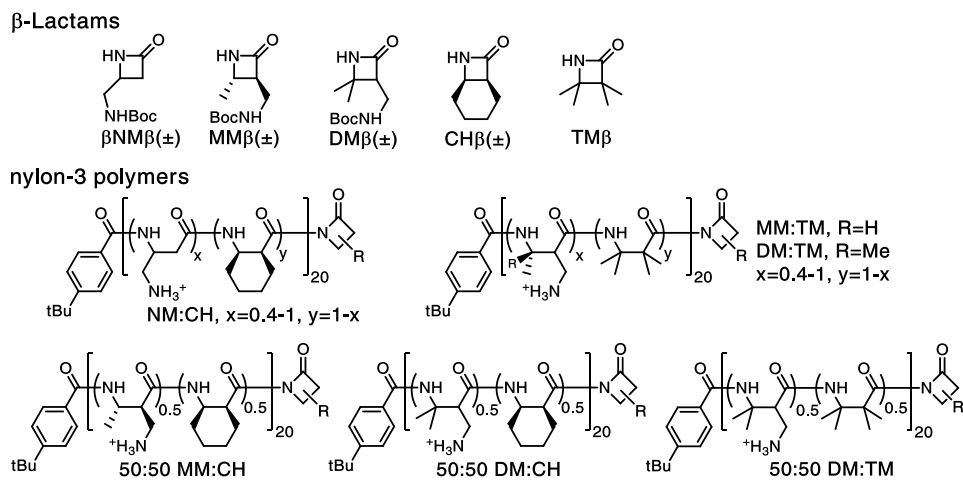

Figure S1. β-Lactams and nylon-3 polymers used in this study. β-Lactams βNMβ, MMβ and DMβ gave the corresponding cationic subunits within copolymers, whereas, CHβ and TMβ gave the corresponding hydrophobic subunits.

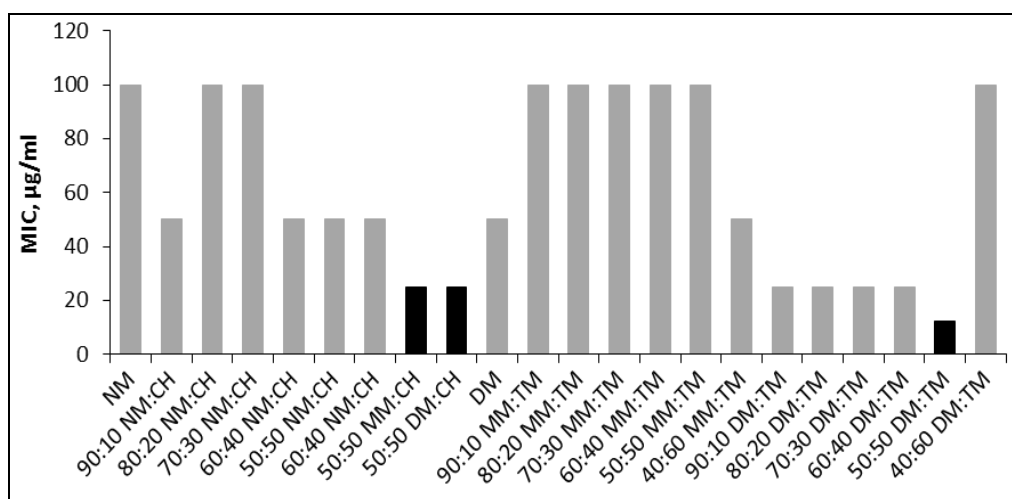

Figure S2. Initial screening of nylon-3 polymers against *C. difficile* vegetative cells (R20291 strain). Three of the most active co-polymers (50:50 MM:CH, 50:50 DM:CH, and 50:50 DM:TM; shown as the black bars) were selected for further study.

Table S1. Viability of spores recovered from outgrowth inhibition (OIC) assays.

| Compound    | Concentration (µg/ml) | R20291 Mean Spore Viability | 630ΔErm Mean Spore Viability |
|-------------|-----------------------|-----------------------------|------------------------------|
| 50:50 DM:TM | 200                   | 0.5% (±0.1%)                | 1.4% (±0.5%)                 |
|             | 100                   | 0.4% (±0.2%)                | 0.7% (±0.2%)                 |
|             | 50                    | 0.4% (±<0.1%)               | 0.5% (±0.1%)                 |
|             | 25                    | 0.3% (±0.1%)                | 0.7% (±0.3%)                 |
|             | 12.5                  | 0.4% (±<0.1%)               | 1.1% (±0.7%)                 |
| 50:50 DM:CH | 200                   | 1.8% (±0.8%)                | 4.7% (±1.7%)                 |
|             | 100                   | 1.0% (±0.6%)                | 3.1% (±0.9%)                 |
|             | 50                    | 0.4% (±<0.1%)               | 3.5% (±2.3%)                 |
|             | 25                    | 0.5% (±0.1%)                | 2.5% (±1.7%)                 |
|             | 12.5                  | 0.9% (±0.2%)                | ND                           |
| 50:50 MM:CH | 200                   | 0.5% (±0.1%)                | 2.7% (±2.0%)                 |
|             | 100                   | 0.6% (±0.2%)                | 1.4% (±0.5%)                 |
|             | 50                    | 0.5% (±0.1%)                | 1.5% (±0.5%)                 |
|             | 25                    | 0.7% (±0.2%)                | 6.0% (±5.2%)                 |
|             | 12.5                  | 2.9% (±3.6%)                | ND                           |
| LL-37       | 80                    | 5.8% (±2.9%)                | 7.8% (±3.9%)                 |
|             | 40                    | 3.6% (±1.8%)                | 4.0% (±4.0%)                 |
|             | 20                    | 1.2% (±0.7%)                | 5.5% (±7.4%)                 |
|             | 10                    | 0.4% (±0.7%)                | ND                           |
| Nisin       | 360                   | 0.4% (±<0.1%)               | NI                           |
|             | 180                   | 0.2% (±0.2%)                | NI                           |
|             | 90                    | 0.4% (±<0.1%)               | NI                           |
| Vancomycin  | 8                     | 0.9% (±0.2%)                | NI                           |
|             | 4                     | 1.3% (±0.2%)                | NI                           |
|             | 2                     | 3.4% (±2.4%)                | NI                           |
|             | 1                     | 7.7% (±7.5%)                | NI                           |
|             | 0.5                   | 21.1% (±21%)                | NI                           |

NI = Not Inhibitory; ND = Not Determined

Table S2. GPC characterization of nylon-3 copolymers

| polymer               | expected subunit ratio<br>(cationic:hydrophobic) | expected<br>Mn | GPC characterization <sup>a</sup> |                   |                   | NMR characterization <sup>b</sup> |                                                  |
|-----------------------|--------------------------------------------------|----------------|-----------------------------------|-------------------|-------------------|-----------------------------------|--------------------------------------------------|
|                       |                                                  |                | PDI <sub>GPC</sub>                | Mn <sub>GPC</sub> | DP <sub>GPC</sub> | DP <sub>NMR</sub>                 | observed subunit ratio<br>(cationic:hydrophobic) |
| 40:60<br><b>MM:TM</b> | 40 : 60                                          | 3399           | 1.22                              | 2338              | 14                | 12                                | 68 : 32                                          |
| 50:50<br><b>MM:TM</b> | 50 : 50                                          | 3574           | 1.16                              | 2825              | 17                | 13                                | 76 : 24                                          |
| 60:40<br><b>MM:TM</b> | 60 : 40                                          | 3748           | 1.15                              | 3274              | 18                | 14                                | 83 : 17                                          |
| 70:30<br><b>MM:TM</b> | 70 : 30                                          | 3922           | 1.17                              | 3423              | 18                | 15                                | 85 : 15                                          |
| 80:20<br><b>MM:TM</b> | 80 : 20                                          | 4096           | 1.15                              | 3774              | 19                | 16                                | 88 : 12                                          |
| 90:10<br><b>MM:TM</b> | 90 : 10                                          | 4270           | 1.13                              | 4370              | 21                | 18                                | 92 : 8                                           |
| 50:50<br><b>MM:CH</b> | 50 : 50                                          | 3555           | 1.32                              | 4938              | 28                | 24                                | 46 : 54                                          |
| 50:50<br><b>DM:CH</b> | 50 : 50                                          | 3694           | 1.05                              | 4766              | 26                | 26                                | 50 : 50                                          |
| 50:50<br><b>DM:TM</b> | 50 : 50                                          | 3714           | 1.13                              | 3205              | 18                | 17                                | 60 : 40                                          |

<sup>a</sup>PDI is the polydispersity index; Mn is the number average molecular weight at the side chain protected stage; DP is the degree of polymerization, i.e., the average number of subunits, calculated from GPC characterization of side chain protected (NHBoc) polymers using THF as the mobile phase. <sup>b</sup>DP and subunit ratio were calculated independently from NMR data using the integration of proton signals. Aromatic protons of *N*-terminal *t*-BuBz group were used for calibration and subunit ratio calculation. Polymers 50:50 MM:CH, 50:50 DM:CH and 50:50 DM:TM were reported previously;<sup>3,4</sup> the data are included here for comparison with the MM:TM series polymers.

$^1\text{H}$  NMR (500 MHz,  $\text{D}_2\text{O}$ )  
 40:60 **MM:TM** one-pot copolymer

GPC: 14 mer  
 NMR: 11.8 mer  
 MM: 8 subunits  
 TM: 3.8 subunits

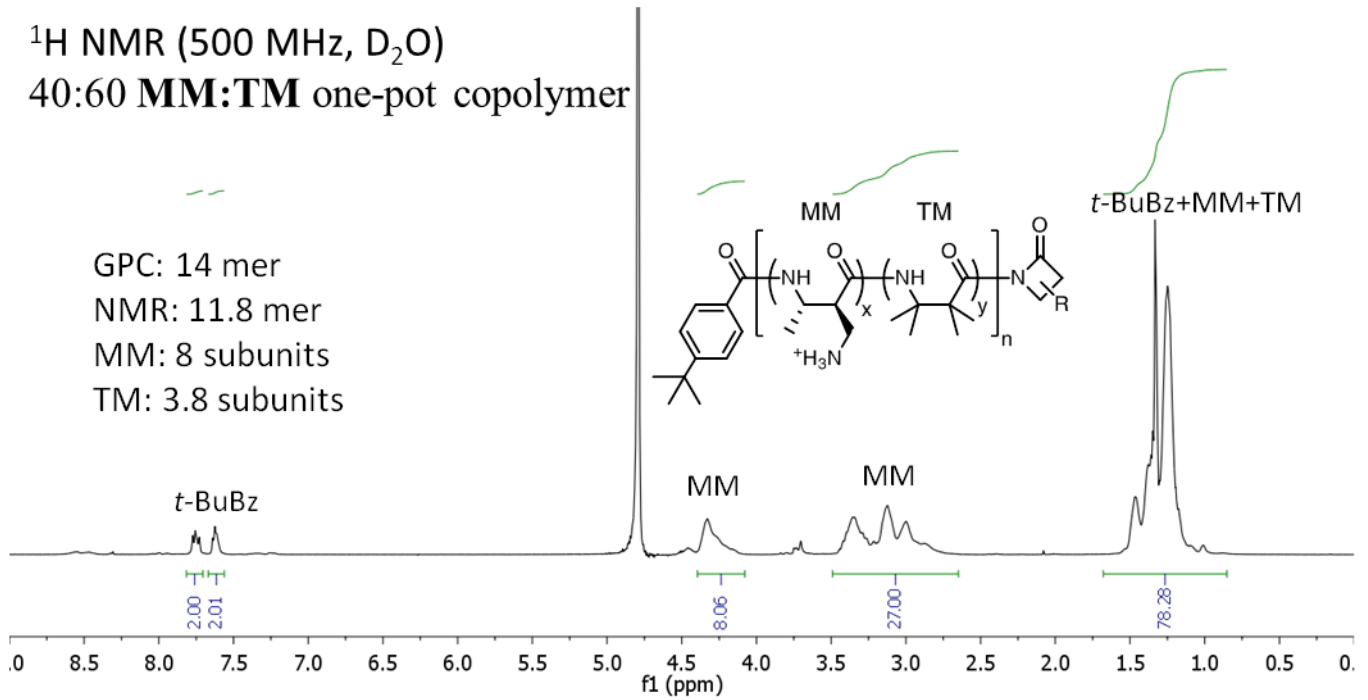

GPC Chromatogram (40:60 **MM:TM** copolymer)

mobile phase: THF

· LS 1    · LS 2    · LS 3    · dRI

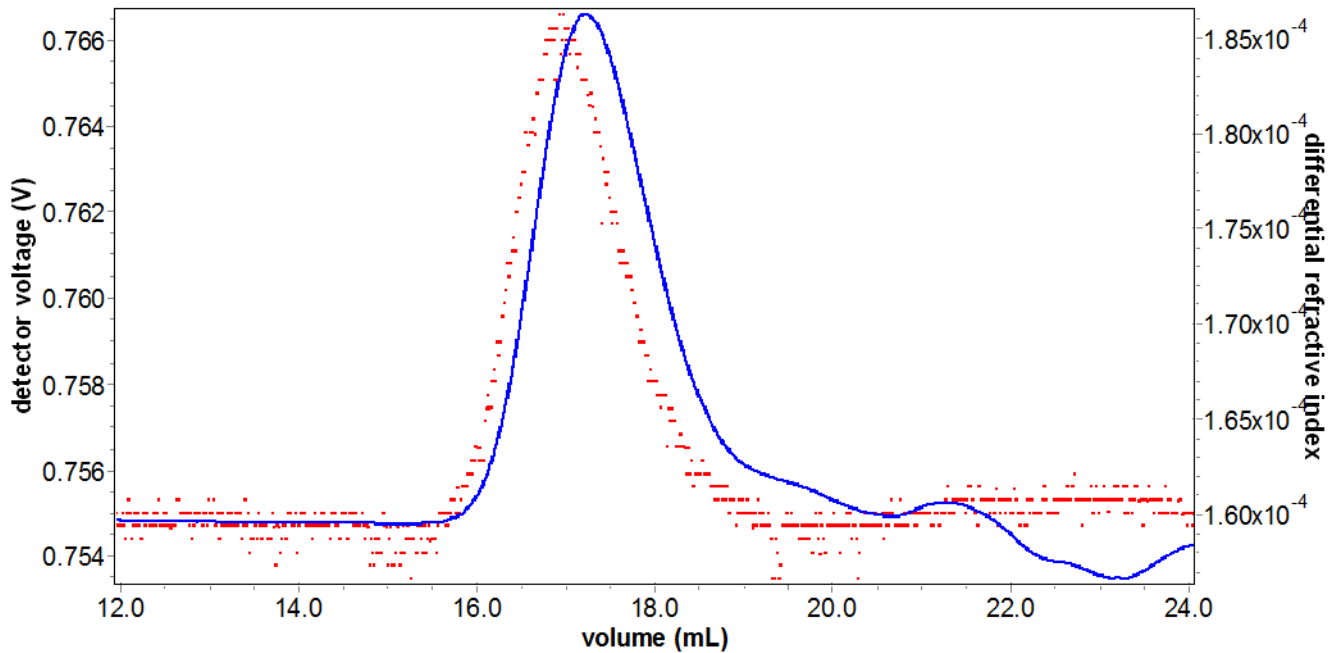

$^1\text{H}$  NMR (500 MHz,  $\text{D}_2\text{O}$ )  
 50:50 **MM:TM** one-pot copolymer

GPC: 17 mer  
 NMR: 13 mer  
 MM: 9.9 subunits  
 TM: 3.1 subunits

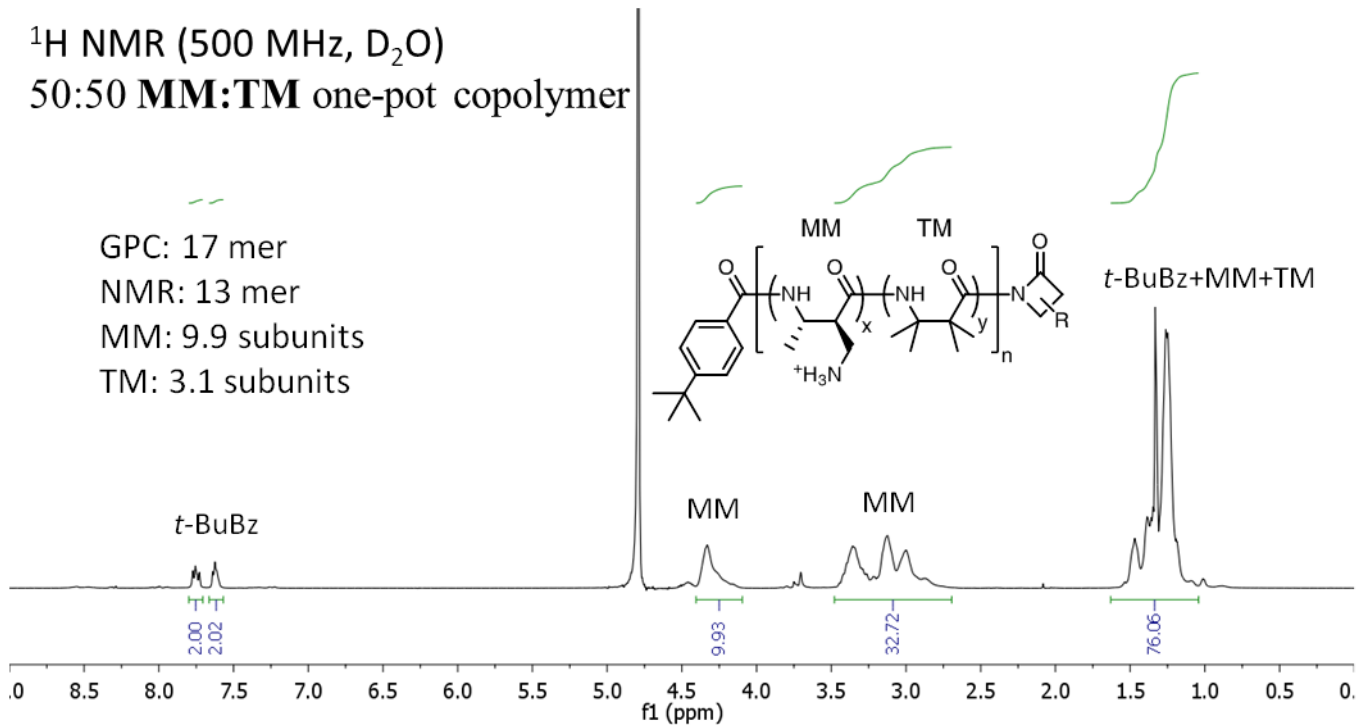

GPC Chromatogram (50:50 **MM:TM** copolymer)

mobile phase: THF

LS 1  LS 2  LS 3  dRI

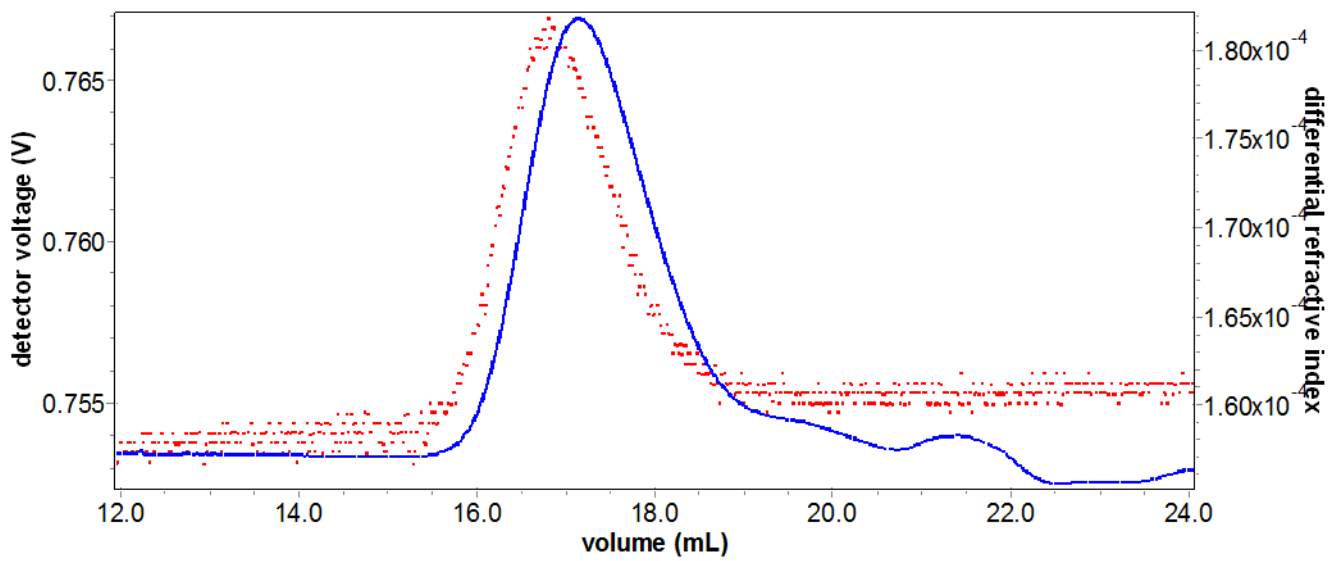

$^1\text{H}$  NMR (500 MHz,  $\text{D}_2\text{O}$ )  
60:40 **MM:TM** one-pot copolymer

GPC: 18 mer  
NMR: 14 mer  
MM: 11.6 subunits  
TM: 2.4 subunits

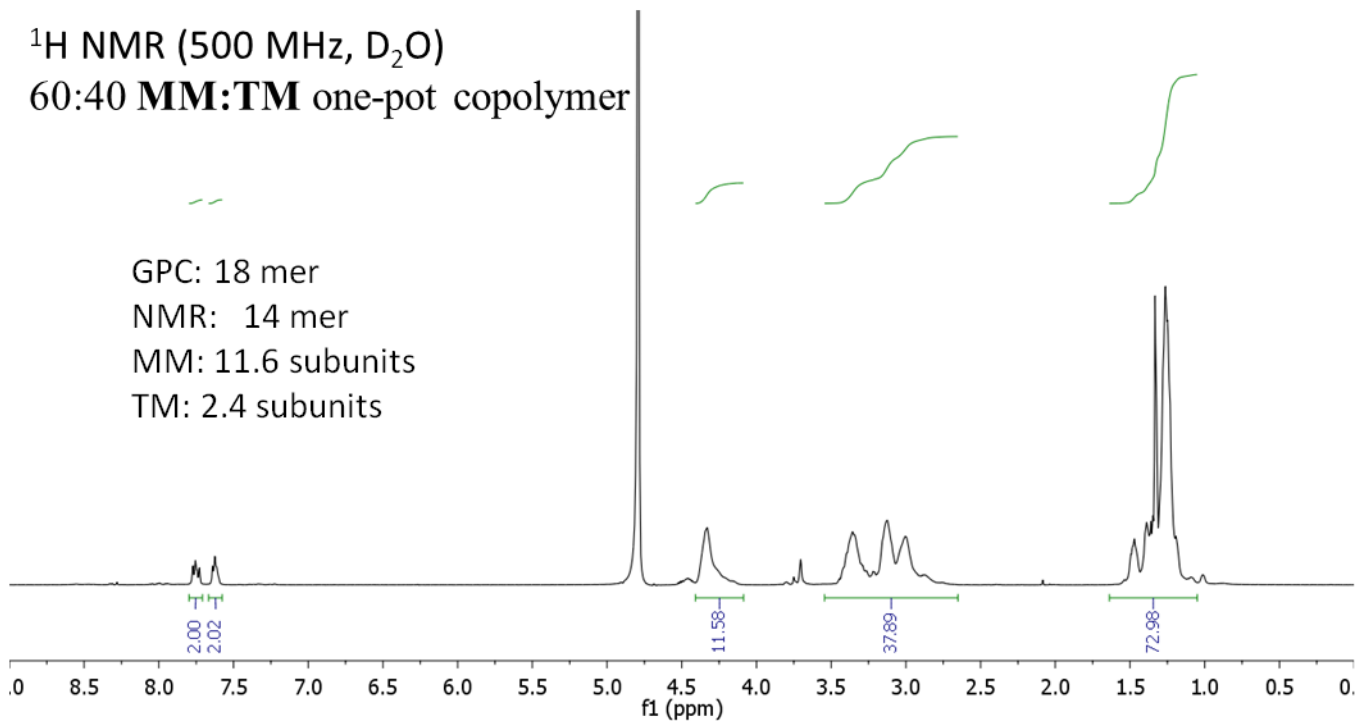

GPC Chromatogram (60:40 **MM:TM** copolymer)

mobile phase: THF

LS 1  LS 2  LS 3  dRI

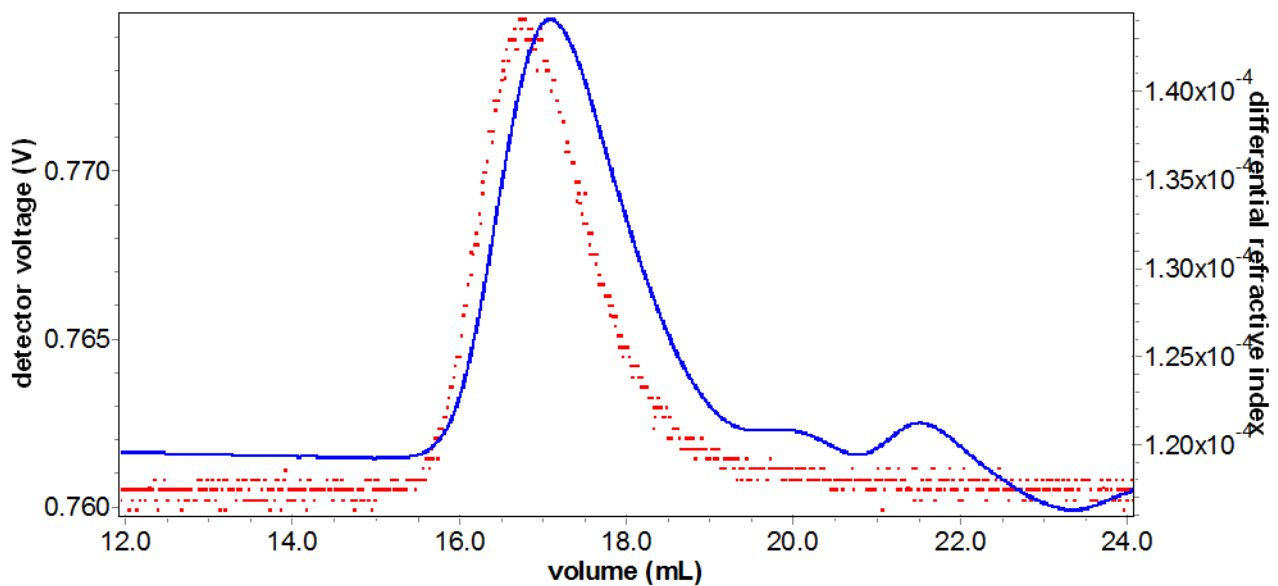



$^1\text{H}$  NMR (500 MHz,  $\text{D}_2\text{O}$ )  
70:30 **MM:TM** one-pot copolymer

GPC: 18 mer  
NMR: 14.6 mer  
MM: 12.4 subunits  
TM: 2.2 subunits

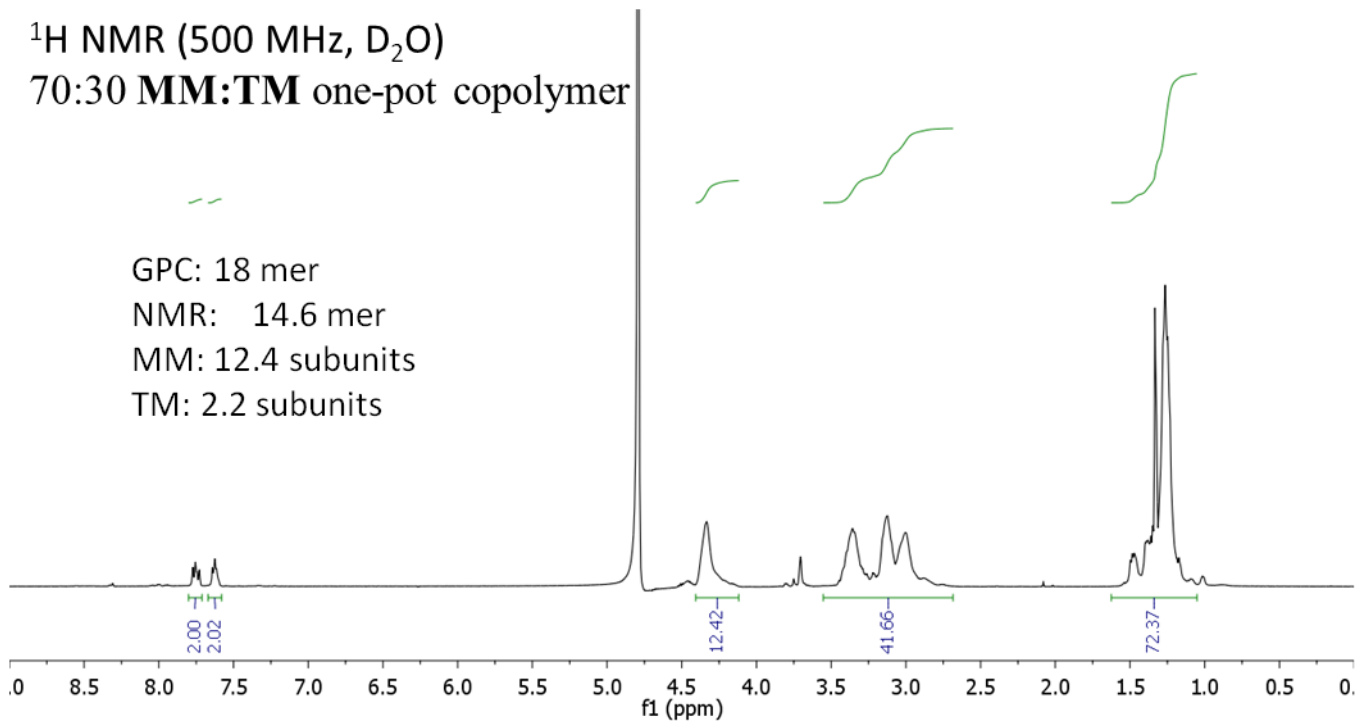

GPC Chromatogram (70:30 **MM:TM** copolymer)

mobile phase: THF

LS 1  LS 2  LS 3  dRI

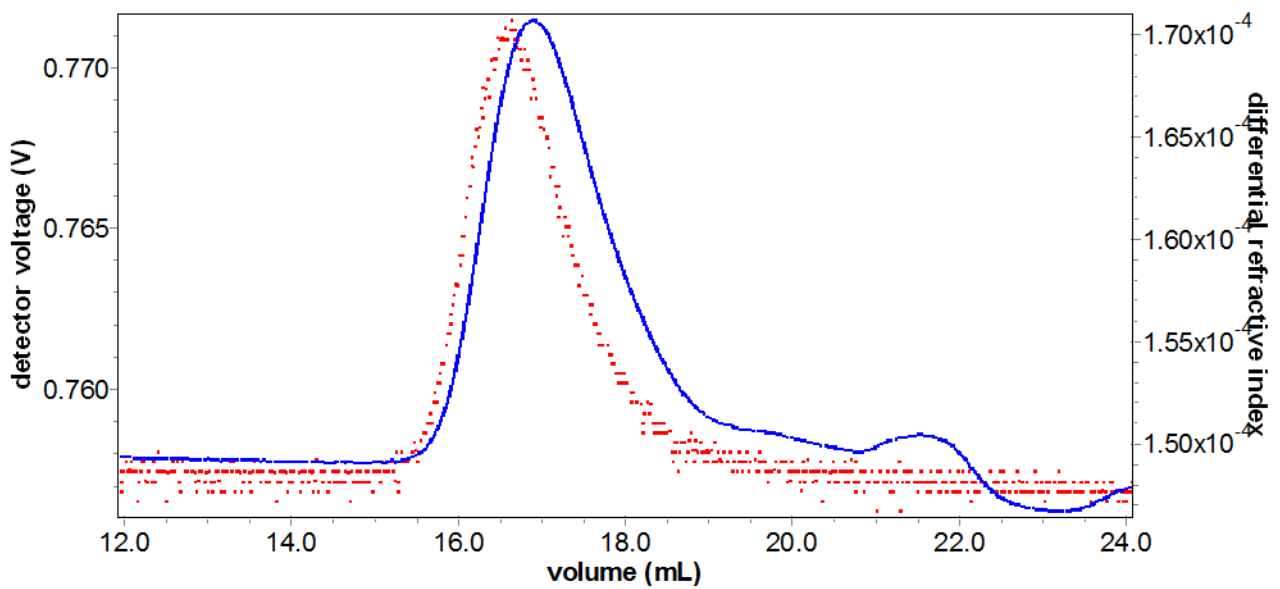

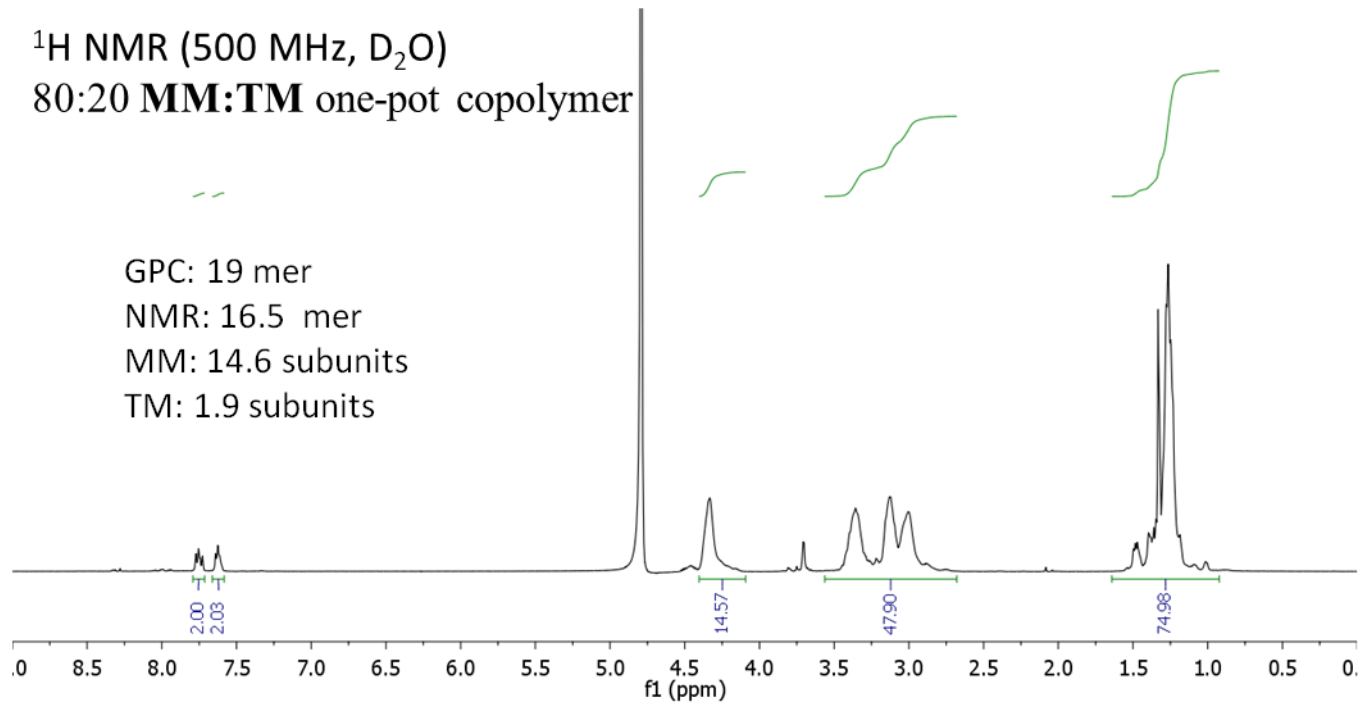

GPC Chromatogram (80:20 **MM:TM** copolymer)

mobile phase: THF

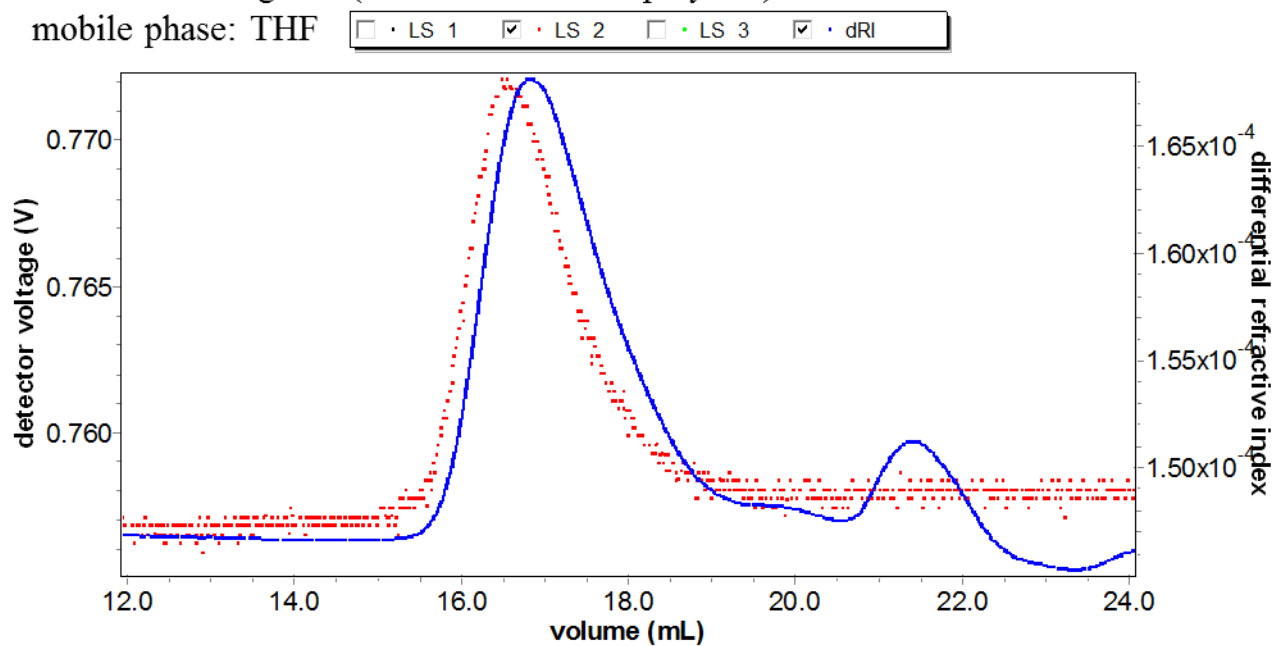

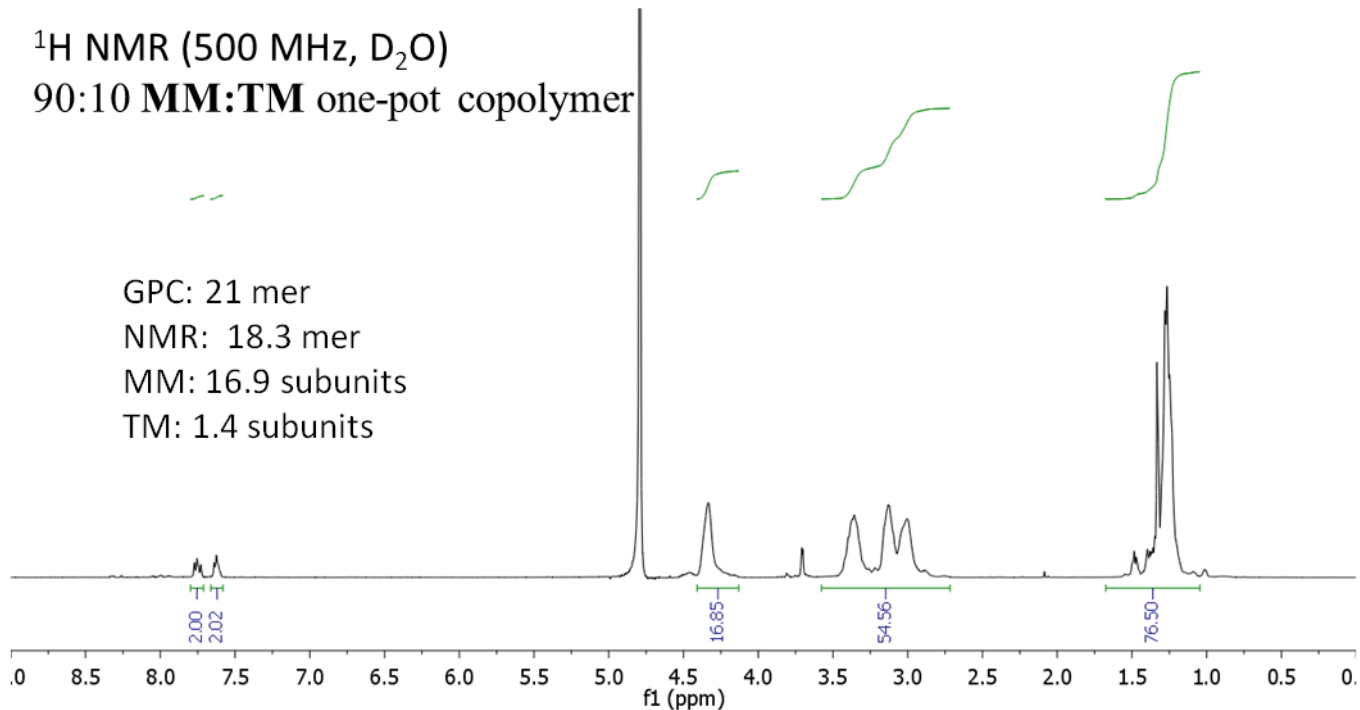

GPC Chromatogram (90:10 **MM:TM** copolymer)

mobile phase: THF

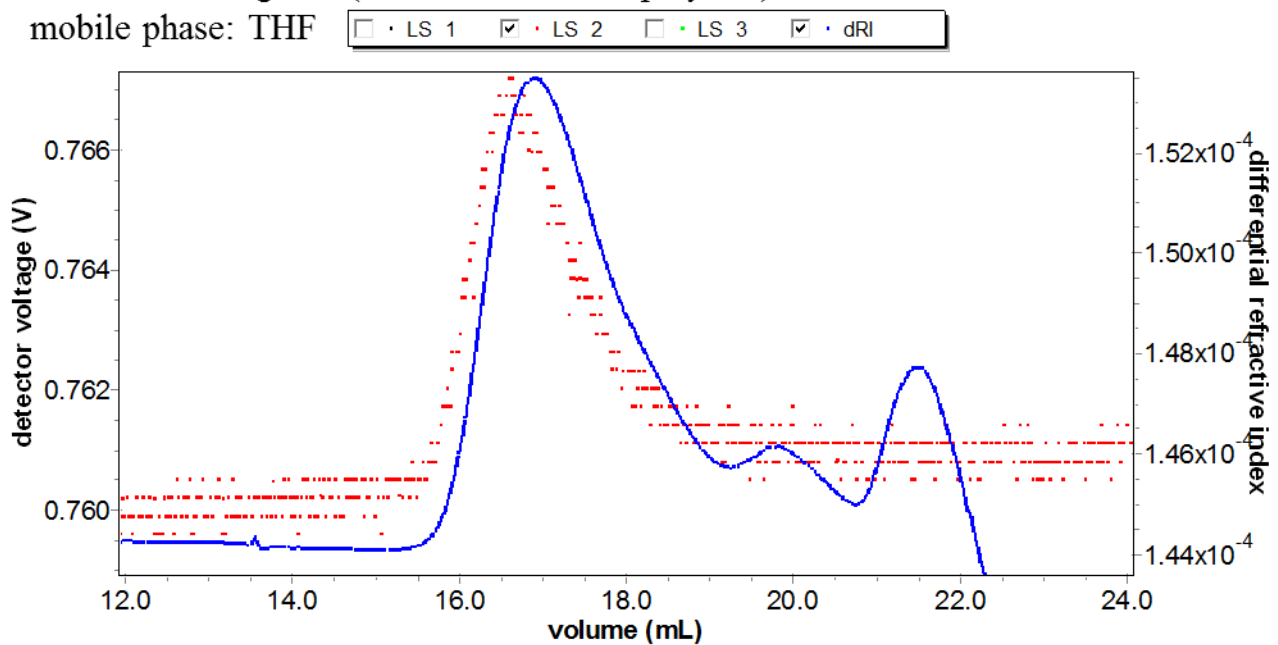

$^1\text{H}$  NMR (400 MHz,  $\text{D}_2\text{O}$ )  
50:50 **MM:CH** one-pot copolymer

GPC: 28 mer  
NMR: 24 mer  
MM: 11 subunits  
CH: 13 subunits

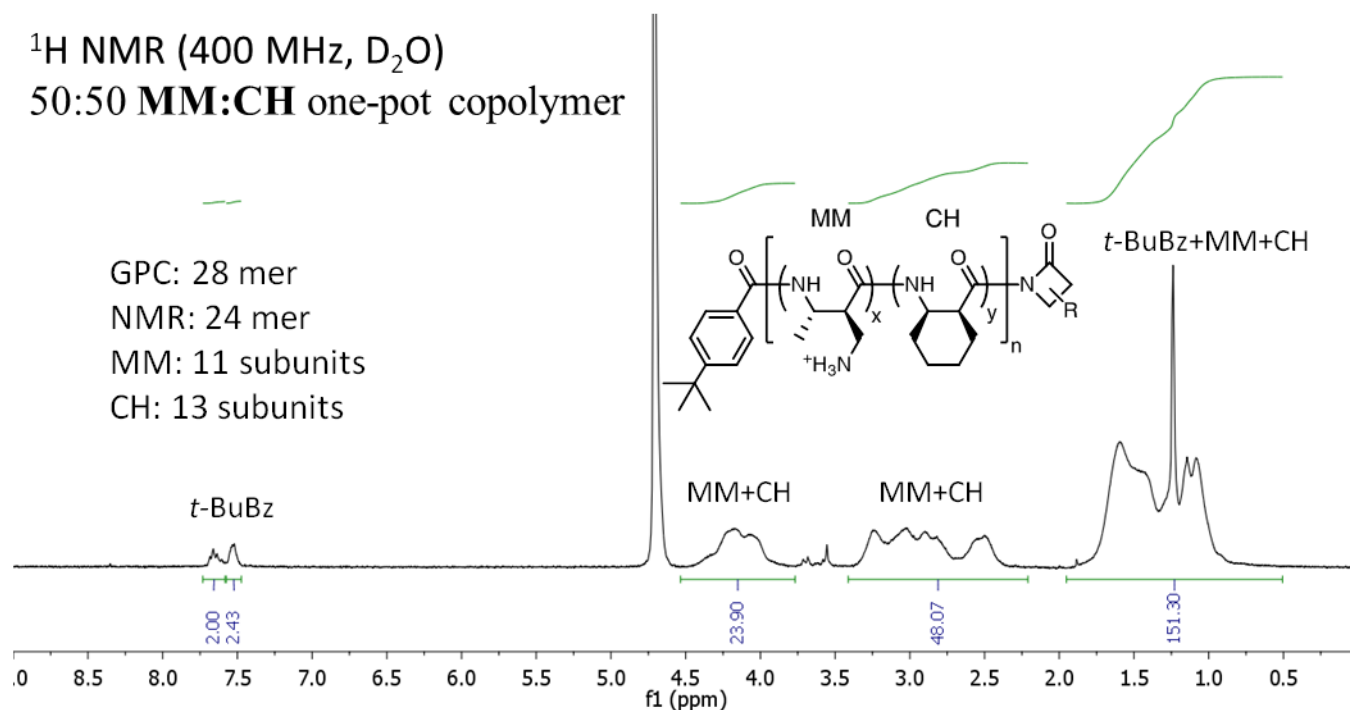

$^1\text{H}$  NMR (400 MHz,  $\text{D}_2\text{O}$ )  
50:50 **DM:CH** one-pot copolymer

GPC: 26 mer  
NMR: 26 mer  
DM: 13 subunits  
CH: 13 subunits

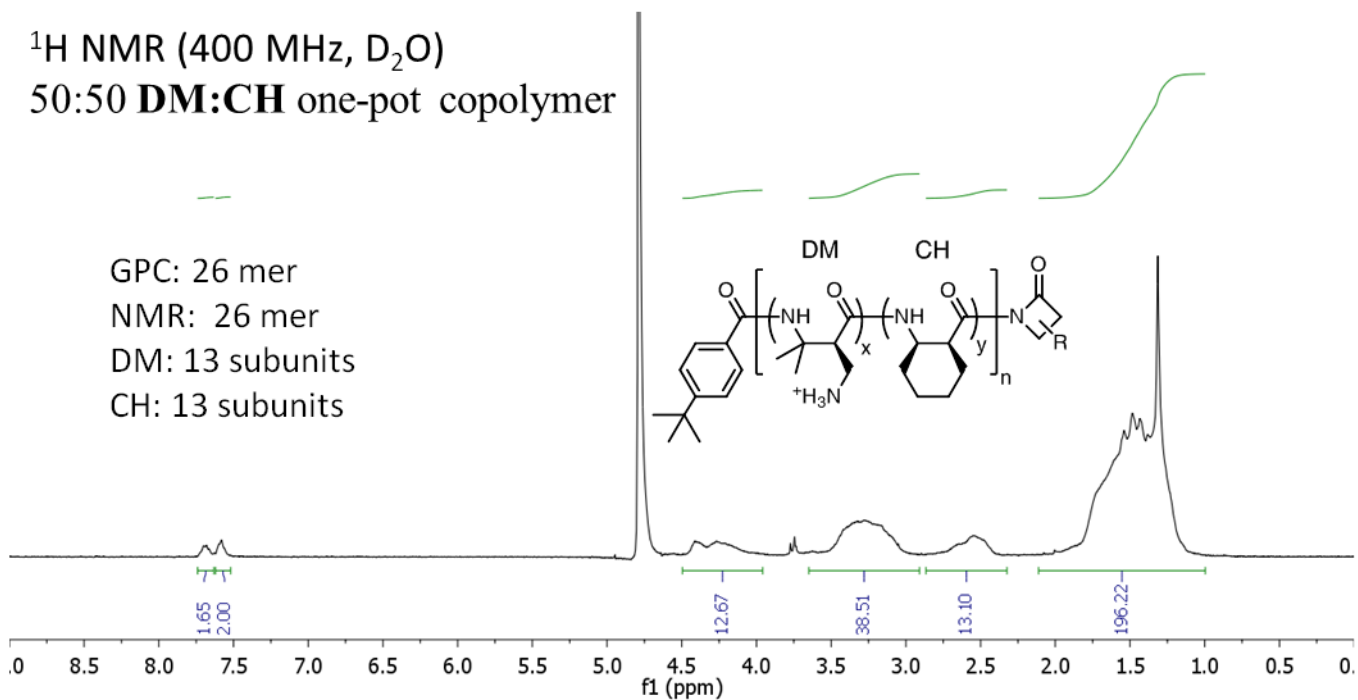

$^1\text{H}$  NMR (400 MHz,  $\text{D}_2\text{O}$ )  
50:50 **DM:TM** one-pot copolymer

GPC: 18 mer  
NMR: 16.9 mer  
DM: 10.2 subunits  
TM: 6.7 subunits

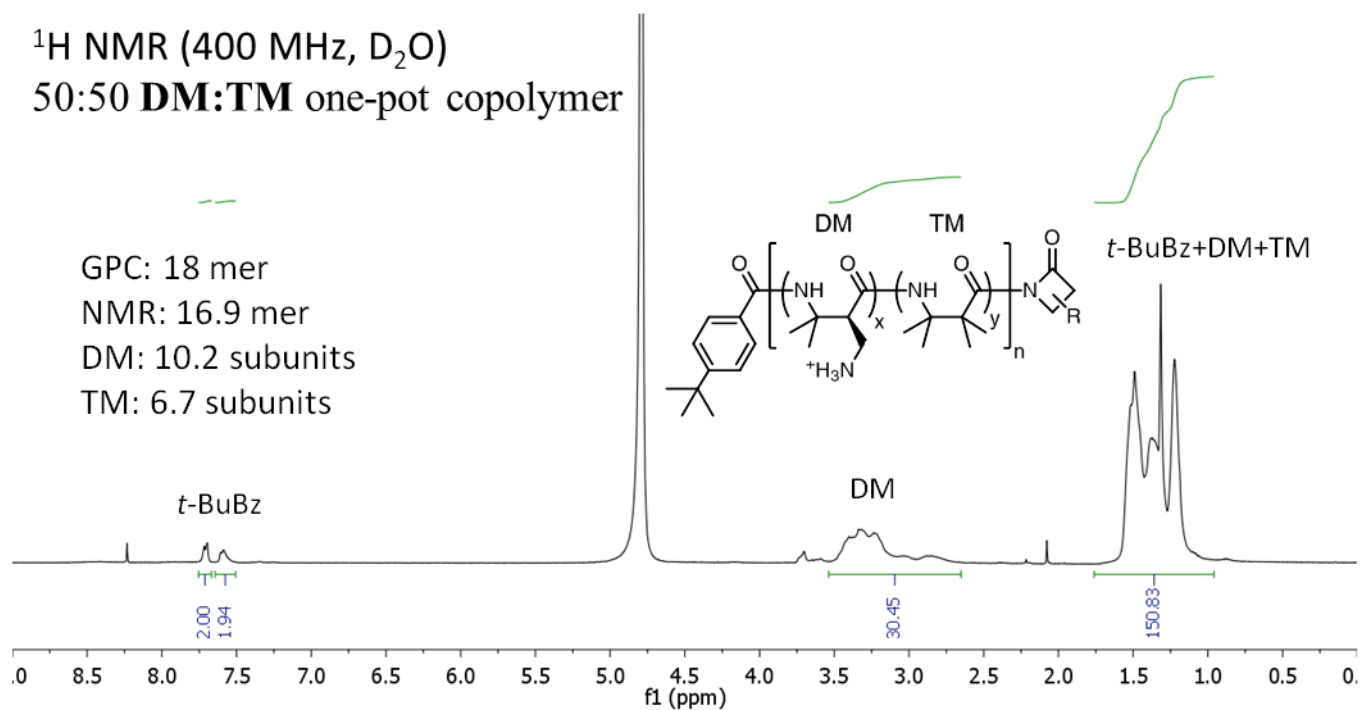

## References

- 1 Lee, M. R., Stahl, S. S., Gellman, S. H. & Masters, K. S. Nylon-3 Copolymers that Generate Cell-Adhesive Surfaces Identified by Library Screening. *J Am Chem Soc* **131**, 16779-16789, (2009).
- 2 Liu, R. H. *et al.* Nylon-3 Polymers with Selective Antifungal Activity. *J Am Chem Soc* **135**, 5270-5273, (2013).
- 3 Liu, R. *et al.* Tuning the Biological Activity Profile of Antibacterial Polymers via Subunit Substitution Pattern. *J Am Chem Soc* **136**, 4410-4418, (2014).
- 4 Liu, R. *et al.* Structure–Activity Relationships among Antifungal Nylon-3 Polymers: Identification of Materials Active against Drug-Resistant Strains of *Candida albicans*. *J Am Chem Soc* **136**, 4333-4342, (2014).
